# Supplementary material for: Efficacy of a novel patient-focused intervention aimed at increasing adherence to guideline-based preventive measures in asplenic patients: the PrePSS trial
Source: Springer Nature journal article supplement (doi:10.1007/s15010-023-02088-7), 2023-09-01

**Table S1:** Operationalization of the PrePSS-score parameters after weighting of the parameters

| Parameter                                                                                                                                                                                                                                                    | Score            |
|--------------------------------------------------------------------------------------------------------------------------------------------------------------------------------------------------------------------------------------------------------------|------------------|
| <b>(1) Guideline-conform sequential pneumococcal vaccination</b>                                                                                                                                                                                             | <b>Range 0-3</b> |
| <ul style="list-style-type: none"> <li>▪ PCV-13 and PSV-23, correct sequence and intervals<sup>1</sup></li> <li>▪ PCV-13 and PSV-23, altered sequence or intervals</li> <li>▪ Only PCV-13 or PSV-23</li> <li>▪ No pneumococcal vaccination</li> </ul>        | 3<br>2<br>1<br>0 |
| <b>(2) Guideline-conform meningococcal vaccination</b>                                                                                                                                                                                                       | <b>Range 0-3</b> |
| <ul style="list-style-type: none"> <li>▪ Men-ACWY and Men-B complete primary immunization<sup>2</sup></li> <li>▪ Men-ACWY and Men-B incomplete primary immunization</li> <li>▪ Men-ACWY or Men-B</li> <li>▪ No meningococcal vaccination</li> </ul>          | 3<br>2<br>1<br>0 |
| <b>(3) Handing-over and carrying a medical alert card</b>                                                                                                                                                                                                    | <b>Range 0-2</b> |
| <ul style="list-style-type: none"> <li>▪ Medical alert card handed out, permanently carried along (e.g. in purse)</li> <li>▪ Medical alert card handed out but not permanently carried along</li> <li>▪ No medical alert card handed out</li> </ul>          | 2<br>1<br>0      |
| <b>(4) Stand by-antibiotic prescribed and available ('pill in the pocket')</b>                                                                                                                                                                               | <b>Range 0-2</b> |
| <ul style="list-style-type: none"> <li>▪ Stand by-antibiotic prescribed, antibiotic permanently available (24 h/7 d)</li> <li>▪ Stand by-antibiotic prescribed, antibiotic not permanently available</li> <li>▪ No stand by-antibiotic prescribed</li> </ul> | 2<br>1<br>0      |
| <b>Total PrePSS-score [Range]</b>                                                                                                                                                                                                                            | <b>0-10</b>      |

<sup>1</sup> 13-valent conjugate vaccine PCV-13 (Prevenar-13<sup>®</sup>) after  $\geq 2$  months followed by 23-valent polysaccharide vaccine PSV-23 (Pneumovax<sup>®</sup>)

<sup>2</sup> Tetravalent meningococcal conjugate vaccination Men-ACWY (Menveo<sup>®</sup>, Nimenrix<sup>®</sup>), two doses at least two months apart; meningococcal serotype B vaccine Men-B (Bexsero<sup>®</sup> [two doses] or Trumenba<sup>®</sup> [three doses]).

Figure S1: PrePSS-score stratified by the intensity of the physician-centered intervention

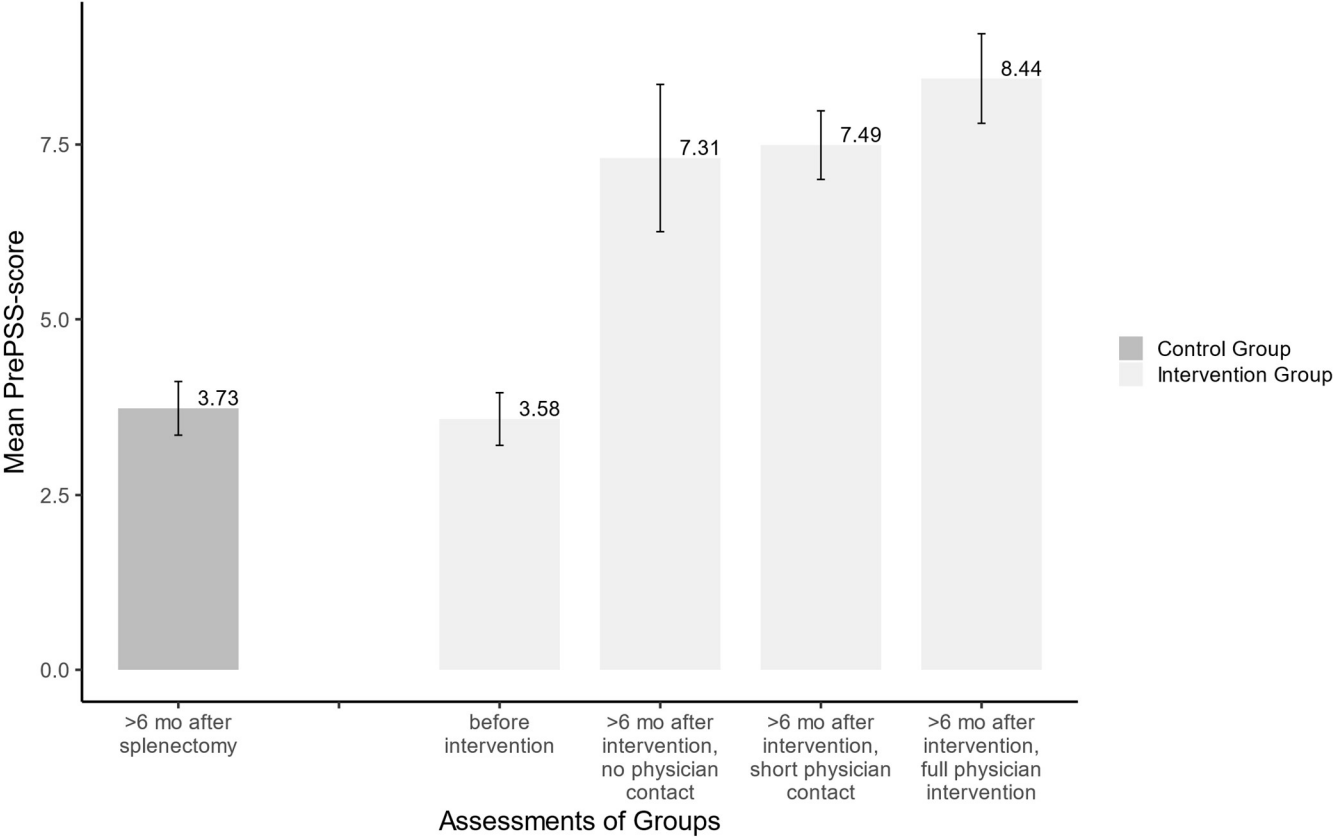

Supplement: MOESM3 [file 25991188]
